# Supplementary material for: Drug resistance-related sunitinib sequestration in autophagolysosomes of endothelial cells
Source: PubMed Central journal article supplement — Int J Oncol. 2019 Nov 26;56(1):113–22. doi: 10.3892/ijo.2019.4924 (PMC6910192; doi:10.3892/ijo.2019.4924), 2019-11-26
Supplement: Supplementary_Data.pdf [file Supplementary_Data.pdf]

Video S1. Sunitinib was added to HMEC-1 cells in a Hi-Q4 dish at a concentration of 6  $\mu$ M and the dish was placed into a time-lapse imaging system. The start of video recording began after a lapse of 15 min, which was required to choose image fields under microscopy. The whole image recording lasted 72 h. The video file shows the emergence of green fluorescent granules containing sunitinib molecules. In the first 24 h, these moving granules containing autofluorescent sunitinib molecules grew in size in the juxtannuclear zones, and quickly clustered together. Subsequently, they either moved to one cell pole or continually rotated around the cell nucleus.
